# Supplementary material for: Highly stable and ordered intermetallic PtCo alloy catalyst supported on graphitized carbon containing Co@CN for oxygen reduction reaction
Source: Royal Society of Chemistry journal article supplement (doi:10.1039/d0ta05182a), 2020-01-01
Supplement: d0ta05182a1.pdf [file d0ta05182a1.pdf]

## Supporting Information:

# Highly Stable Ordered Intermetallic PtCo Alloy Catalyst Supported on Graphitized Carbon Containing Co@CN for Oxygen Reduction Reaction

*Won Suk Jung*<sup>a\*</sup>, *Woong Hee Lee*<sup>b</sup>, *Hyung-Suk Oh*<sup>b, c, d\*</sup>, and *Branko N. Popov*<sup>e\*</sup>

<sup>a</sup> Department of Chemical Engineering, Hankyong National University, Jungang-ro 327, Anseong-si, Gyeonggi-do, 17579, Republic of Korea

<sup>b</sup> Clean Energy Research Center, Korea Institute of Science and Technology (KIST), Hwarang-ro 14-gil 5, Seongbuk-gu, Seoul, 02792, Republic of Korea

<sup>c</sup> Division of Energy and Environmental Technology, KIST school, Korea University of Science and Technology, Seoul 02792, Republic of Korea.

<sup>d</sup> KHU-KIST Department of Convergencing Science and Technology, Kyung Hee University, Seoul 02447, Republic of Korea.

<sup>e</sup> Center for Electrochemical Engineering, Department of Chemical Engineering, University of South Carolina, Columbia, SC, 29208, USA

\* Corresponding author: jungw@khnu.ac.kr, hyung-suk.oh@kist.re.kr, popov@cec.sc.edu

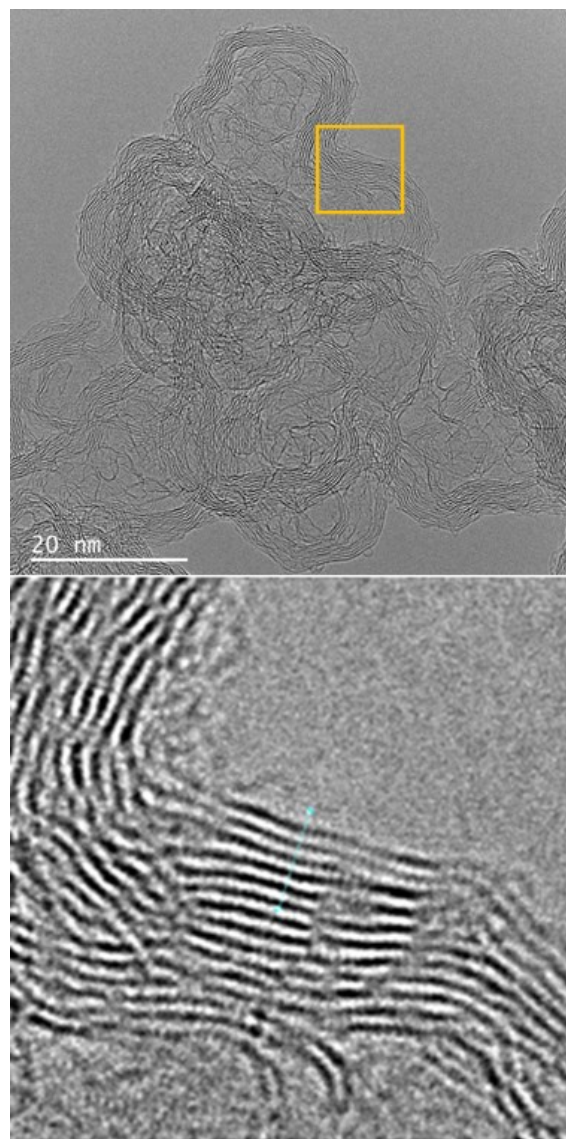

**Figure S1.** HR-TEM image of GC prepared at 1700 °C for 2 h under N<sub>2</sub> atmosphere.

**Table S1.** Characteristics of Co@CN/GC obtained from XPS N1s peak.

|                                          | BE [eV] | FWHM  | at. % |
|------------------------------------------|---------|-------|-------|
| Pyridinic- N                             | 398.55  | 1.374 | 27.8  |
| Pyrrolic-N and/or<br>pyridone-N          | 400.18  | 2.389 | 37.0  |
| Quaternary-N                             | 401.12  | 3.026 | 19.3  |
| Pyridinic-N <sup>+</sup> -O <sup>-</sup> | 403.70  | 4.991 | 15.9  |

**Table S2.** Characteristics of Co@CN/GC and CB obtained from XPS C1s peak.

|                                    | Co@CN/GC |       |       | CB      |       |       |
|------------------------------------|----------|-------|-------|---------|-------|-------|
|                                    | BE [eV]  | FWHM  | at. % | BE [eV] | FWHM  | at. % |
| graphitic                          | 284.59   | 0.803 | 67.7  | 284.29  | 0.892 | 64.4  |
| defect                             | 285.36   | 0.811 | 9.8   | 285.09  | 1.599 | 20.4  |
| amine                              | 286.02   | 1.014 | 4.0   | -       | -     | -     |
| alcohol and ether                  | 286.54   | 1.793 | 8.2   | 286.57  | 1.377 | 4.0   |
| carbonyl                           | 288.01   | 1.317 | 2.4   | 287.98  | 2.293 | 4.3   |
| carboxyl                           | 289.11   | 1.314 | 1.9   | 289.09  | 2.861 | 1.1   |
| carbonate                          | 290.37   | 1.448 | 2.4   | 290.29  | 2.075 | 4.6   |
| $\pi$ - $\pi^*$ shake-up satellite | 291.52   | 1.874 | 3.6   | 291.58  | 1.47  | 1.1   |

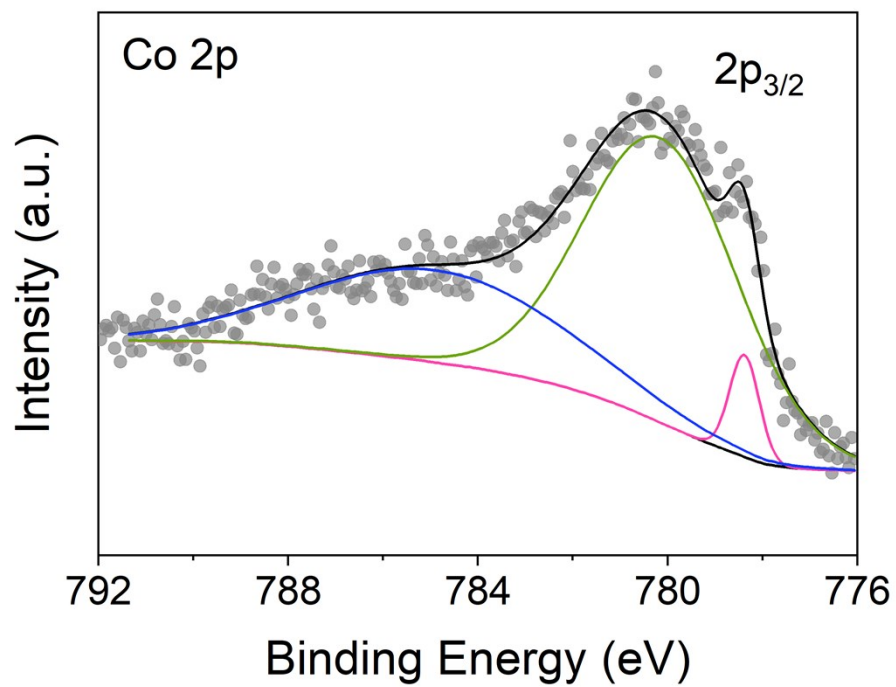

**Figure S2.** Co 2p XPS spectra of PtCo/NGC

**Table S3.** Characteristics of PtCo/NGC obtained from XPS Co 2p peak.

|                 | PtCo/NGC |       |       |
|-----------------|----------|-------|-------|
|                 | BE [eV]  | FWHM  | at. % |
| Co <sup>0</sup> | 778.38   | 0.734 | 4.2   |
| Co(II)          | 780.14   | 3.843 | 62.0  |
| Satellites      | 784.90   | 6.611 | 33.9  |

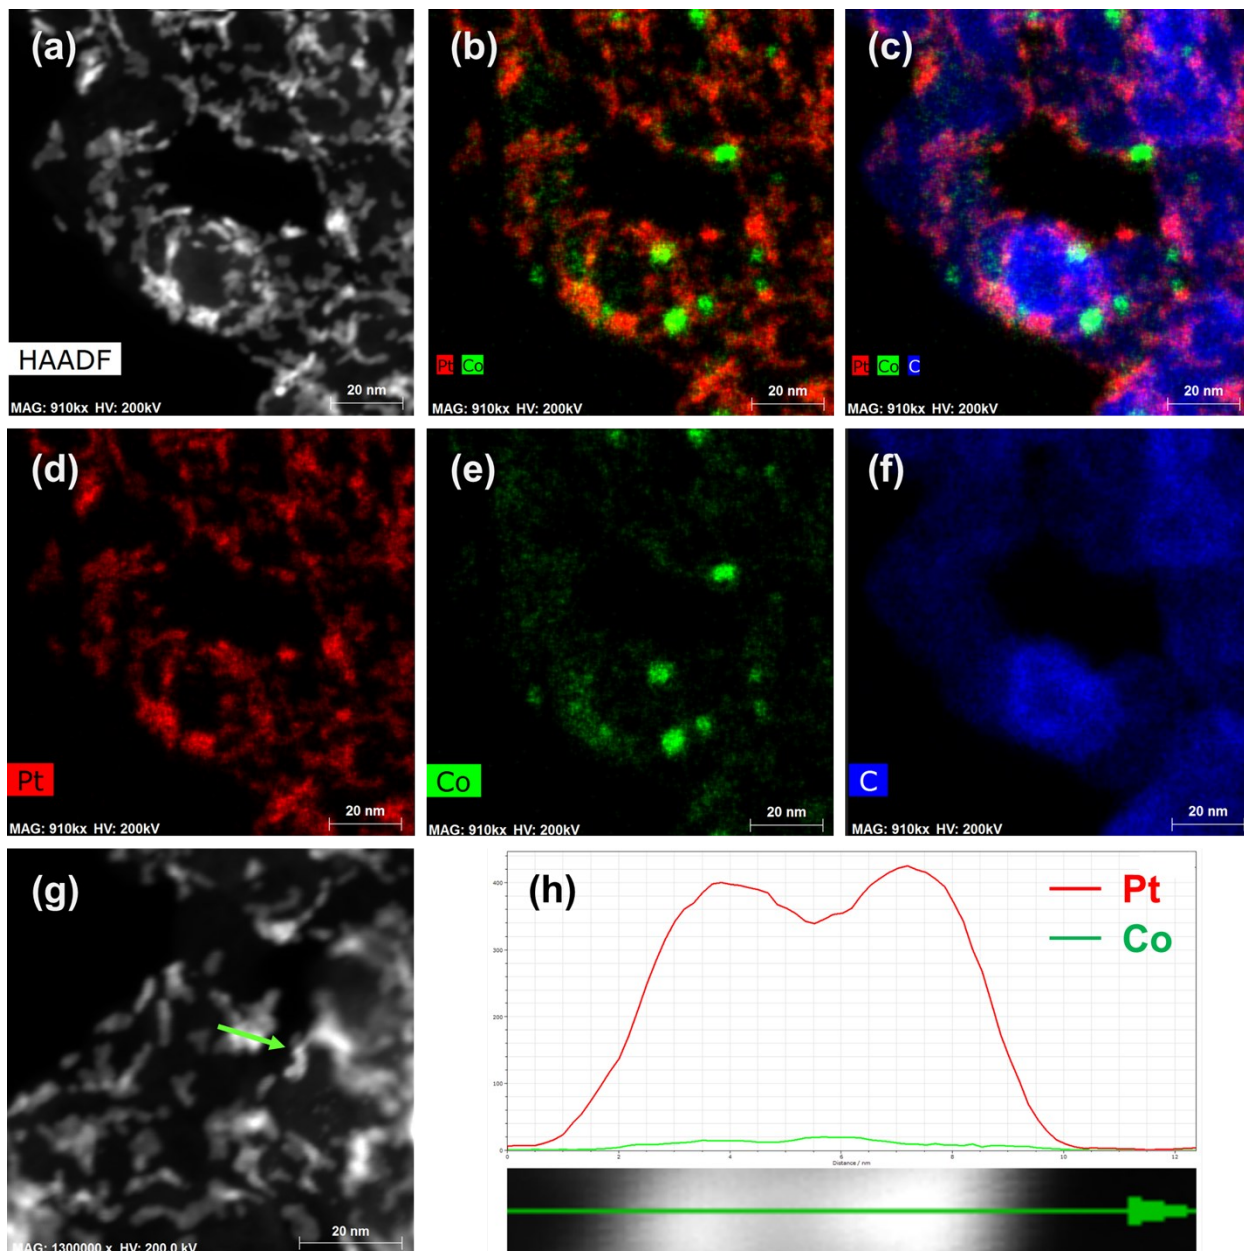

**Figure S3.** (a) HAADF-STEM image of Pt/Co@CN/GC. EDS elemental mapping images of Pt/Co@CN/GC: (b, c) overlap, (d) Pt, (e) Co, and (f) carbon. (g, h) EDS cross-sectional compositional line profile of Pt/Co@CN/GC.

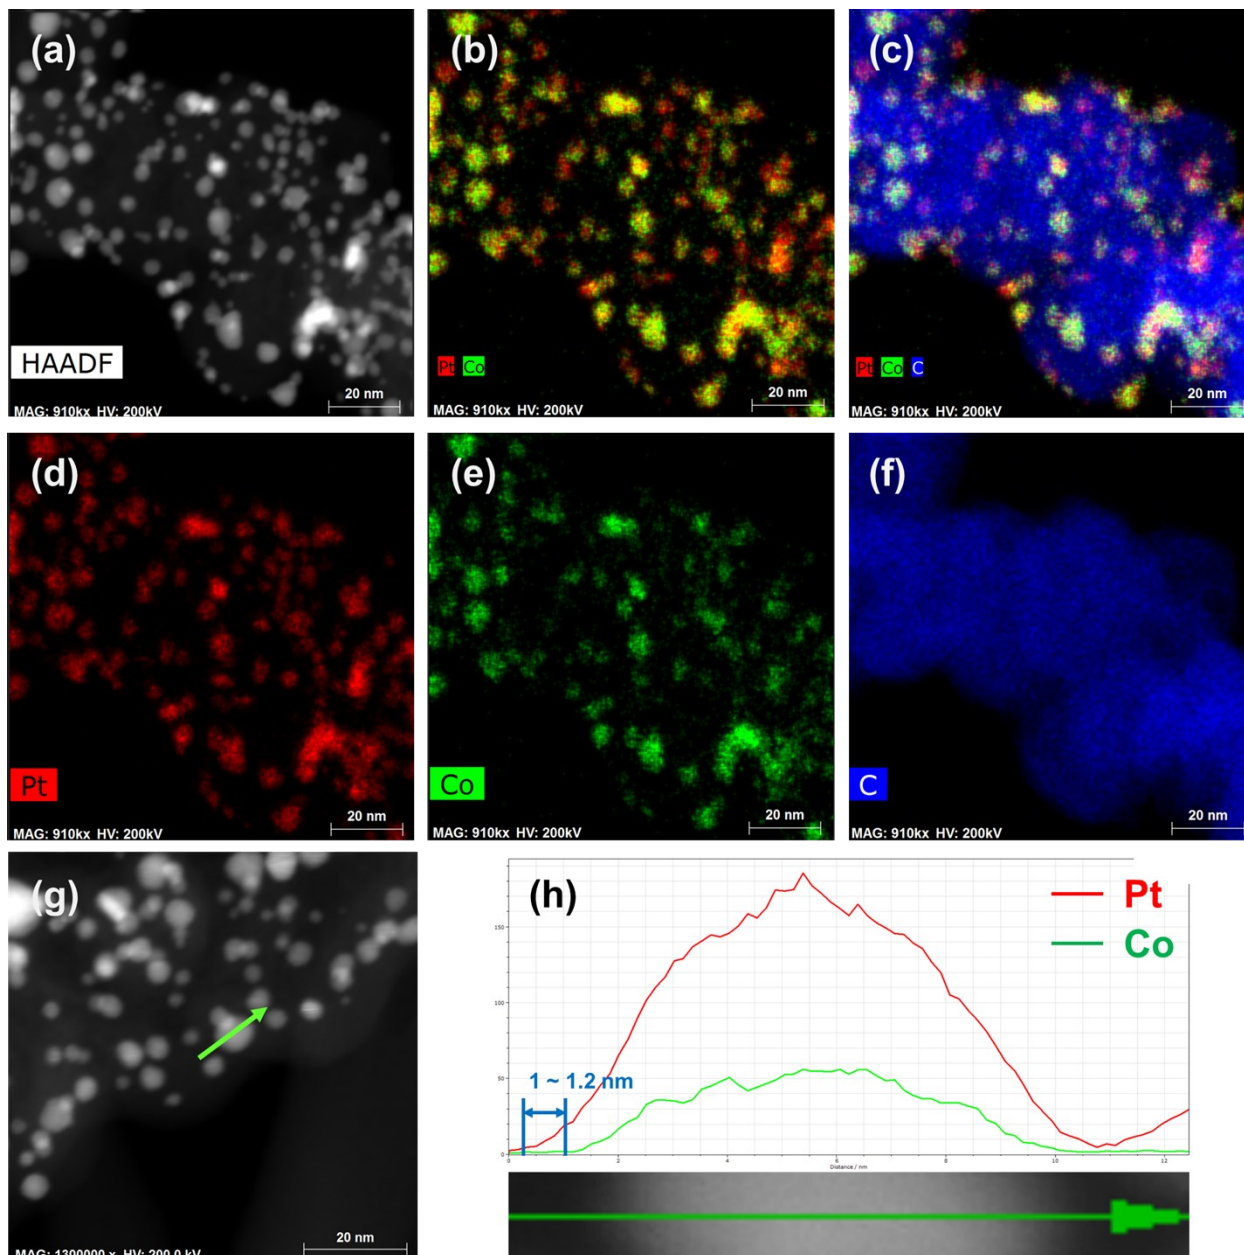

**Figure S4.** (a) HAADF-STEM image of PtCo/NGC which heat-treated the Pt/Co@CN/GC catalyst for 30 min. EDS elemental mapping images of PtCo/NGC (30 min): (b, c) overlap, (d) Pt, (e) Co, and (f) carbon. (g, h) EDS cross-sectional compositional line profile of PtCo/NGC (30 min).



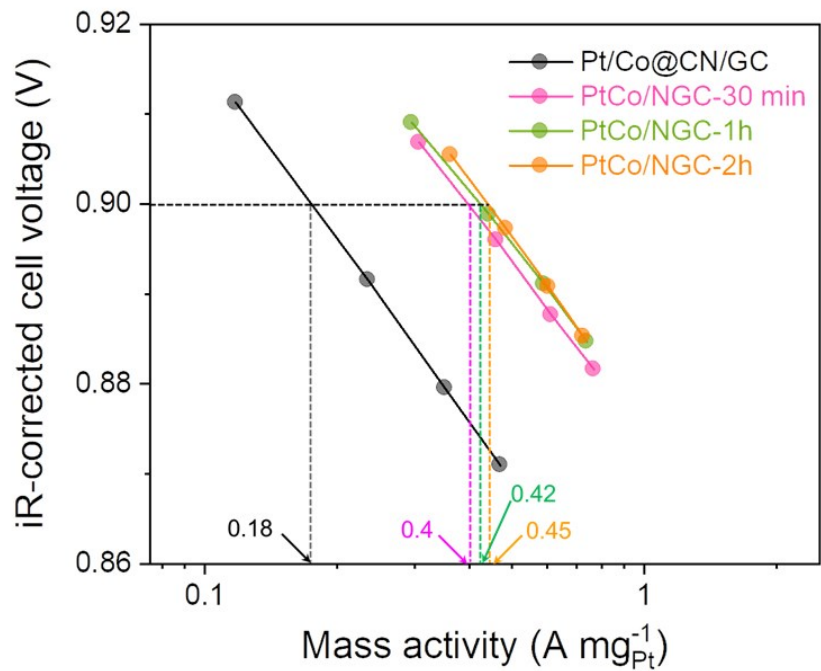

**Figure S5.** Mass activity of Pt/Co@CN/GC and PtCo/NGC with different heat-treatment duration time (30 min, 1 h and 2 h) at 800 °C. Commercial Pt/C (TEC10E50E, Tanaka Kikinzoku Kogyo K.K.) was used as a catalyst for the anode.

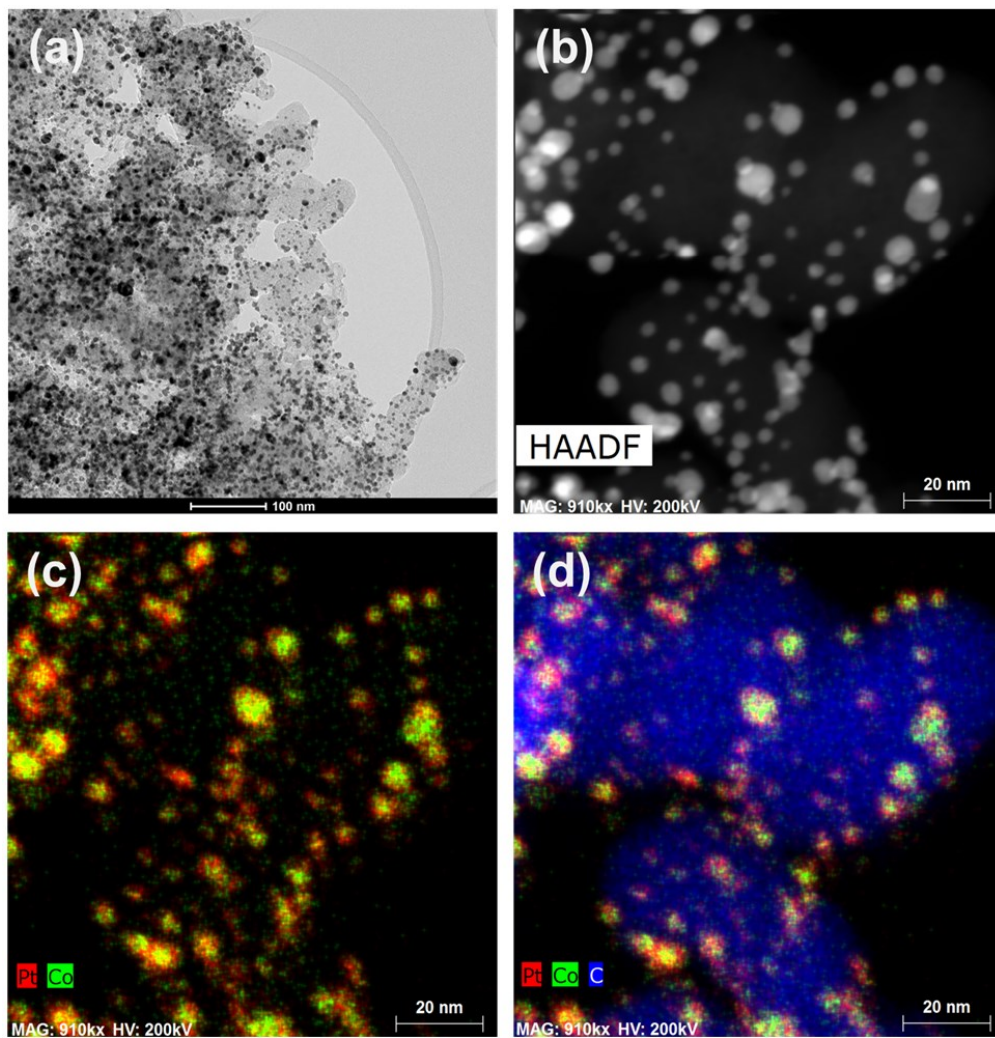

**Figure S6.** (a) HR-TEM and (b) HAADF-STEM images of PtCo/NGC after AST measurement. (c, d) Elemental mapping images of PtCo/NGC: Pt (red), Co (green), and Carbon (blue).



**Table S4.** Summary of the accelerated stress test (AST) results for oxygen reduction reaction in PEMFCs

| Catalysts<br>(Pt loading at<br>cathode)                              | Cell<br>Temp.<br>[°C] | AST conditions<br>(cycle No. and<br>potential range) | Initial mass<br>activity @<br>0.9 V <sub>iR-free</sub><br>[A mg <sup>-1</sup> ] | Activity loss<br>[%] | Initial<br>ECSA<br>[m <sup>2</sup> g <sub>Pt</sub> <sup>-1</sup> ] | ECSA loss<br>[%] | Performance loss                                           | Ref No.                   |
|----------------------------------------------------------------------|-----------------------|------------------------------------------------------|---------------------------------------------------------------------------------|----------------------|--------------------------------------------------------------------|------------------|------------------------------------------------------------|---------------------------|
| PtCo/NGC<br>(0.1 mg cm <sup>-2</sup> )                               | 80                    | 30,000 cycles<br>(0.6 – 1.0 V)                       | 0.45                                                                            | 53                   | 74                                                                 | 27               | 34 mV at 800 mA<br>cm <sup>-2</sup>                        | This work                 |
| Pt <sub>2.6</sub> Co TONs/C<br>(0.1 mg cm <sup>-2</sup> )            | 80                    | 30,000 cycles<br>(0.6 – 0.95 V)                      | 0.294                                                                           | 24                   | 99                                                                 | 17               | -                                                          | Xia et al. (1)            |
| PtNi@Pt/C<br>(0.2 mg cm <sup>-2</sup> )                              | 80                    | 30,000 cycles<br>(0.6 – 1.0 V)                       | -                                                                               | -                    | -                                                                  | 22               | ca. 100 mV at 800<br>mA cm <sup>-2</sup>                   | Lee et al.* (2)           |
| Ga–PtNi/C<br>(0.15 mg cm <sup>-2</sup> )                             | 65                    | 30,000 cycles<br>(0.6 – 1.0 V)                       | -                                                                               | -                    | -                                                                  | -                | 33% loss (current<br>density) at 0.6 V                     | Cho et al. (3)            |
| Pt/IrO <sub>2</sub> -TiO <sub>2</sub><br>(0.45 mg cm <sup>-2</sup> ) | 80                    | 10,000 cycles<br>(0.6 – 1.0 V)                       | 0.088                                                                           | 19                   | 43                                                                 | 60               | 100 mV at 800<br>mA cm <sup>-2</sup>                       | Kotz et al. (4)           |
| Pd/C@Pt <sub>skin</sub><br>(0.033 mg cm <sup>-2</sup> )              | 65                    | 30,000 cycles<br>(0.6 – 1.0 V)                       | 0.3                                                                             | -                    | 92.3                                                               | -                | -                                                          | Hou et al. (5)            |
| Dealloyed PtNi <sub>3</sub> /C<br>(0.1 mg cm <sup>-2</sup> )         | 80                    | 30,000 cycles<br>(0.6 – 1.0 V)                       | 0.5                                                                             | 0                    | 37                                                                 | 29               | -                                                          | Mukerjee et al.<br>(6)    |
| CNF/TiO <sub>2</sub> -Pt<br>(0.4 mg cm <sup>-2</sup> )               | 75                    | -                                                    | 0.282                                                                           | -                    | 44.97                                                              | -                | -                                                          | Shul et al. (7)           |
| GO coated Pt/C<br>(0.2 mg cm <sup>-2</sup> )                         |                       | 30,000 cycles<br>(0.6 – 1.0 V)                       | -                                                                               | -                    | 48.8                                                               | 33               | -                                                          | Rafailovich<br>et al. (8) |
| Pt on NbO <sub>x</sub> /C<br>(0.1 mg cm <sup>-2</sup> )              | 80                    | 30,000 cycles<br>(0.6 – 0.95 V)                      | 0.328                                                                           | 36                   | 29                                                                 | 51               | -                                                          | Xu et al. (9)             |
| PtNi/C<br>(0.1 mg cm <sup>-2</sup> )                                 | 80                    | 30,000 cycles<br>(0.6 – 1.0 V)                       | -                                                                               | 58                   | 42.4                                                               | 59               | ca.50 m V <sub>iR-free</sub><br>at 800 mA cm <sup>-2</sup> | Mustain et al.*<br>(10)   |
| PtCuCO/C<br>(0.2 mg cm <sup>-2</sup> )                               | 80                    | 30,000 cycles<br>(0.5 – 1.0 V)                       | 0.42                                                                            | 40.5                 | -                                                                  | 51               | -                                                          | Strasser et al.<br>(11)   |

\* Performance loss represented here is estimated from V-i polarization curves.

## References

1. M. Shen, M. Xie, J. Slack, K. Waldrop, Z. Chen, Z. Lyu, S. Cao, M. Zhao, M. Zhao, M. Chi, P. N. Pintauro, R. Cao, Y. Xia, Pt-Co truncated octahedral nanocrystals: a class of highly active and durable catalysts toward oxygen reduction. *Nanoscale* **12**, 11718-11727 (2020).
2. J. Choi, J. Jang, C. Roh, S. Yang, J. Kim, J. Lim, S. J. Yoo, H. Lee, Gram-scale synthesis of highly active and durable octahedral PtNi nanoparticle catalysts for proton exchange membrane fuel cell. *Applied Catalysis B: Environmental* **225**, 535-537 (2018).
3. J. Lim, H. Shin, M. Kim, H. Lee, K. Lee, Y. Kwon, D. Song, S. Oh, H. Kim, E. Cho, Ga-doped Pt-Ni octahedral nanoparticles as a highly active and durable electrocatalyst for oxygen reduction reaction. *Nano Letters* **18**, 2450-2458 (2018).
4. A. Pătru, A. Rabis, S. E. Temmel, R. Kotz, T. J. Schmidt, Pt/IrO<sub>2</sub>-TiO<sub>2</sub> cathode catalyst for low temperature polymer electrolyte fuel cell—Application in MEAs, performance and stability issues. *Catalysis Today* **262**, 161-169 (2016).
5. S. Hong, M Hou, H. Zhang, Y. Jiang, Z. Shao, B. Yi, A high-performance PEM fuel cell with ultralow platinum electrode via electrospinning and underpotential deposition. *Electrochimica Acta* **245**, 403-409 (2017).
6. Q. Jia, J. Li, K. Caldwell, D. E. Ramaker, J. M. Ziegelbauer, R. S. Kukreja, A. Kongkanand, S. Mukerjee, Circumventing metal dissolution induced degradation of Pt-alloy catalysts in proton exchange membrane fuel cells: revealing the asymmetric volcano nature of redox catalysis. *ACS Catalysis* **6**, 928-938 (2016).
7. Y. Jeon, Y. Ji, Y. I. Cho, C. Lee, D. Park, Y. Shul, Oxide-carbon nanofibrous composite support for a highly active and stable polymer electrolyte membrane fuel-cell catalyst. *ACS nano* **12**, 6819-6829 (2018).
8. L. Wang, S. Bliznakov, R. Isseroff, Y. Zhou, X. Zuo, A. Raut, W. Wang, M. Cuiffo, T. Kim, M. H. Rafailovich, Enhancing proton exchange membrane fuel cell performance via graphene oxide surface synergy. *Applied Energy* **261**, 114277 (2020).
9. C. Xu, J. Yang, E. Liu, Q. Jia, G. M. Veith, G. Nair, S. D. Pietro, K. Sun, J. Chen, P. Pietrasz, Z. Lu, M. Jagner, K. K. Gath, S. Mukerjee, J. R. Waldecker, Physical vapor deposition process for engineering Pt based oxygen reduction reaction catalysts on NbO<sub>x</sub> templated carbon support. *Journal of Power Sources* **451**, 227709 (2020).
10. X. Peng, S. Zhao, T. J. Omasta, J. M. Roller, W. E. Mustain, Activity and durability of Pt-Ni nanocage electrocatalysts in proton exchange membrane fuel cells. *Applied Catalysis B: Environmental* **203**, 927-935 (2017).
11. K. C. Neyerlin, R. Srivastava, C. Yu, P. Strasser, Electrochemical activity and stability of dealloyed Pt-Cu and Pt-Cu-Co electrocatalysts for the oxygen reduction reaction (ORR). *Journal of Power Sources* **186**, 261-267 (2009).
